# Supplementary material for: Phosphodiesterase 3A: a new player in development of interstitial cells of Cajal and a prospective target in gastrointestinal stromal tumors (GIST)
Source: PubMed Central journal article supplement (PMC5522287; doi:10.18632/oncotarget.17010), 2017-04-10
Supplement: oncotarget-08-41026-s001.pdf [file oncotarget-08-41026-s001.pdf]

# Phosphodiesterase 3A: a new player in development of interstitial cells of Cajal and a prospective target in gastrointestinal stromal tumors (GIST)

## Supplementary Materials

### SUPPLEMENTARY FIGURES AND TABLES

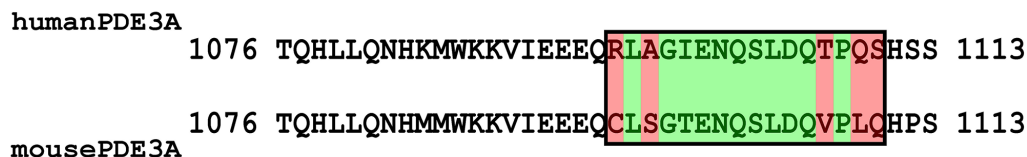

**Supplementary Figure 1: Alignment of the amino-acid sequence of the immunogenic peptide used to raise the anti-human PDE3A antibody.** Black box highlights the sequence of the human PDE3A immunogenic peptide [20], aligned to the mouse PDE3A peptide sequence (NCBI Reference Sequence: NP\_000912.3 and NP\_061249.1). Red indicates mismatched amino-acids. Green indicates matching amino-acids.

## GIST882

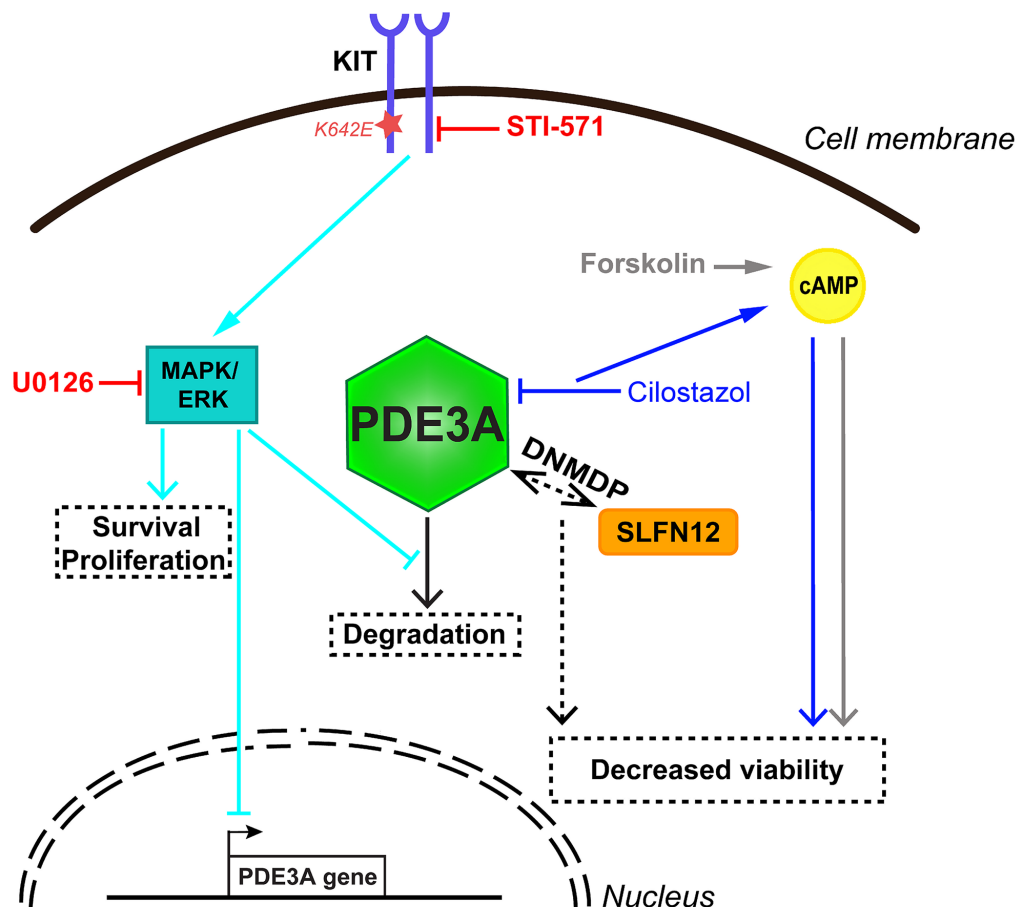

**Supplementary Figure 2: Graphical model of the PDE3A interplay in GIST882 cells.** Plain cyan arrows: Oncogenic mutation (K642E) of the KIT receptor leads to activation of MAPK/ERK pathway and promotes cell viability. Other signaling pathways downstream of KIT receptor not represented here for the sake of clarity. Plain red arrows: KIT inhibition by STI-571 downregulates the MAPK/ERK pathway, decreases the amount of PDE3A protein and simultaneously upregulates PDE3A mRNA. The MEK inhibitor U0126 replicates the effect of STI-571, suggesting a central role for the MAPK/ERK pathway in PDE3A protein and mRNA turn-over in GIST882 cells. Plain blue arrows: the PDE3 inhibitor cilostazol reduces GIST882 cell viability without affecting the MAPK/ ERK pathway (pERK). (not shown) cilostazol synergizes with STI-571 to reduce GIST882 cell viability (Chou- Talalay's combination index <1). Refer to results section for details. Plain grey arrows: Forskolin, a direct activator of adenylyl cyclase, reduced GIST882 viability and synergizes with cilostazol (Chou-Talalay's combination index <1). Refer to result section for details. Dashed black arrows: GIST882 cells express both PDE3A and SLFN12. DNMDP exerts a cytotoxic effect on GIST882 cells, likely by inducing a neomorphic protein-protein interaction between PDE3A and SLFN12, as recently described by de Waal *et al.* in other cancer cells [18].

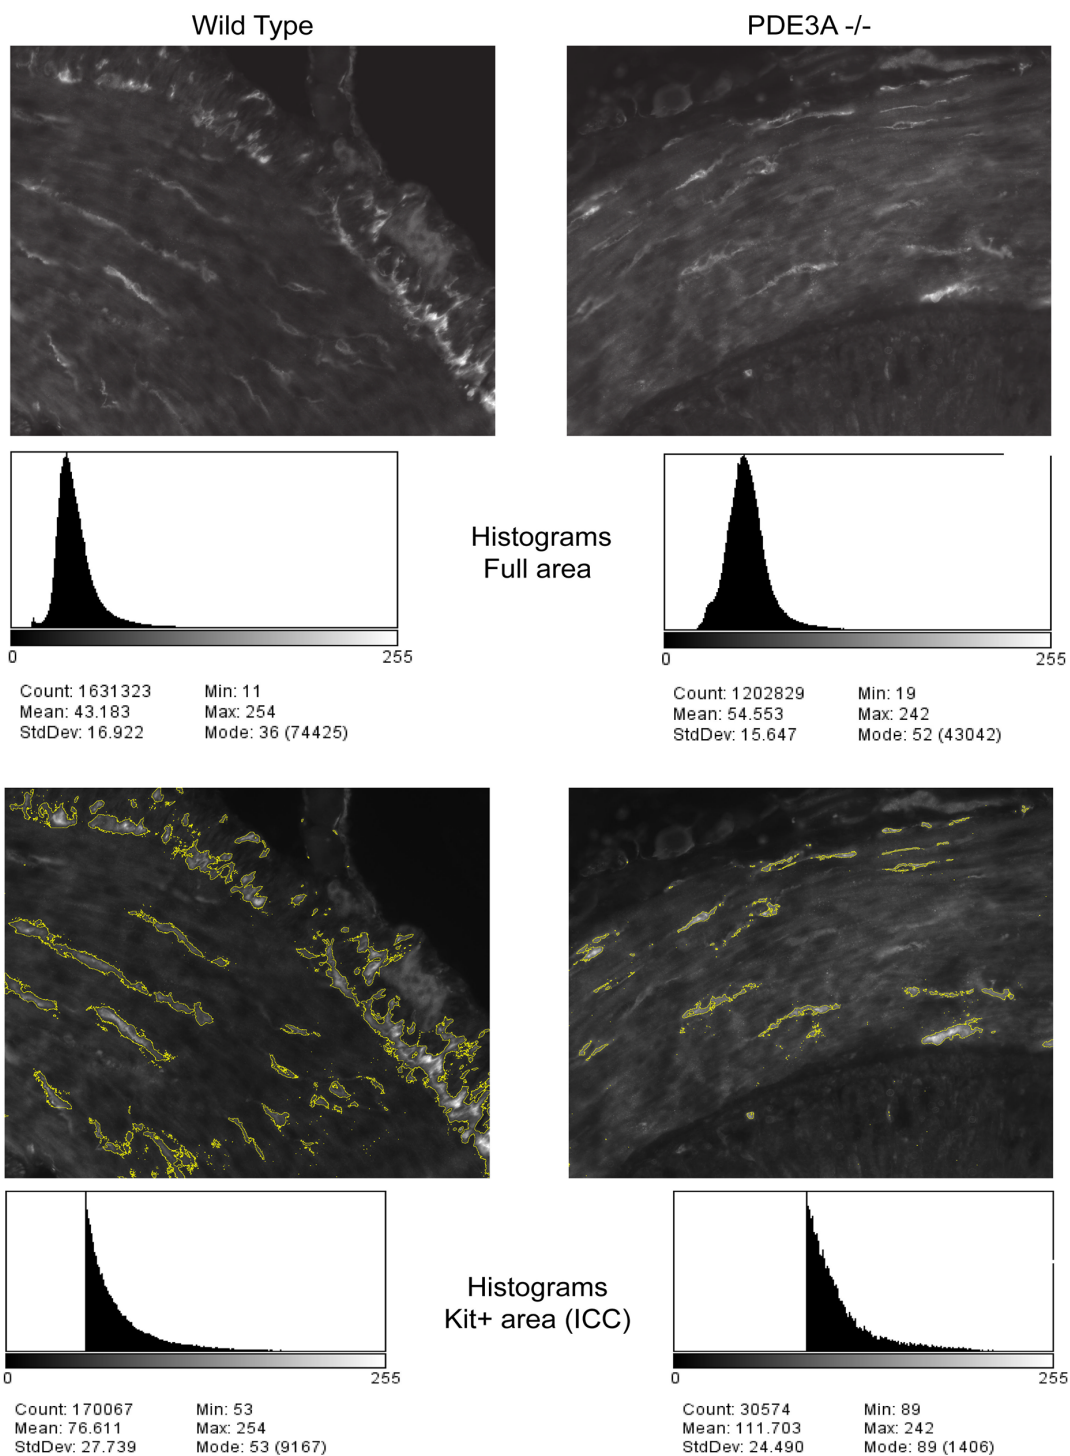

**Supplementary Figure 3: KIT-ir intensity is similar in ICC of WT and PDE3A<sup>-/-</sup> mice.** Upper panels: Representative fields of view of WT (left) and PDE3A<sup>-/-</sup> (right) muscularis propria stained with KIT antibody. Histograms of global pixel intensity values of both pictures are within the same range. Lower panels: Same fields of view with segmented KIT<sup>+</sup> areas highlighted in yellow. Histogram of pixel intensity values for the segmented KIT<sup>+</sup> area are within the same range. The reduction of KIT<sup>+</sup> ICC observed in PDE3A<sup>-/-</sup> gut cannot be attributed to a reduced level of KIT-ir intensity. The similar distribution of KIT-ir intensity in WT and PDE3A<sup>-/-</sup> gut indicates a genuine reduction of the number of KIT<sup>+</sup> ICC in the PDE3A<sup>-/-</sup> gut. Scale bar = 50µm.

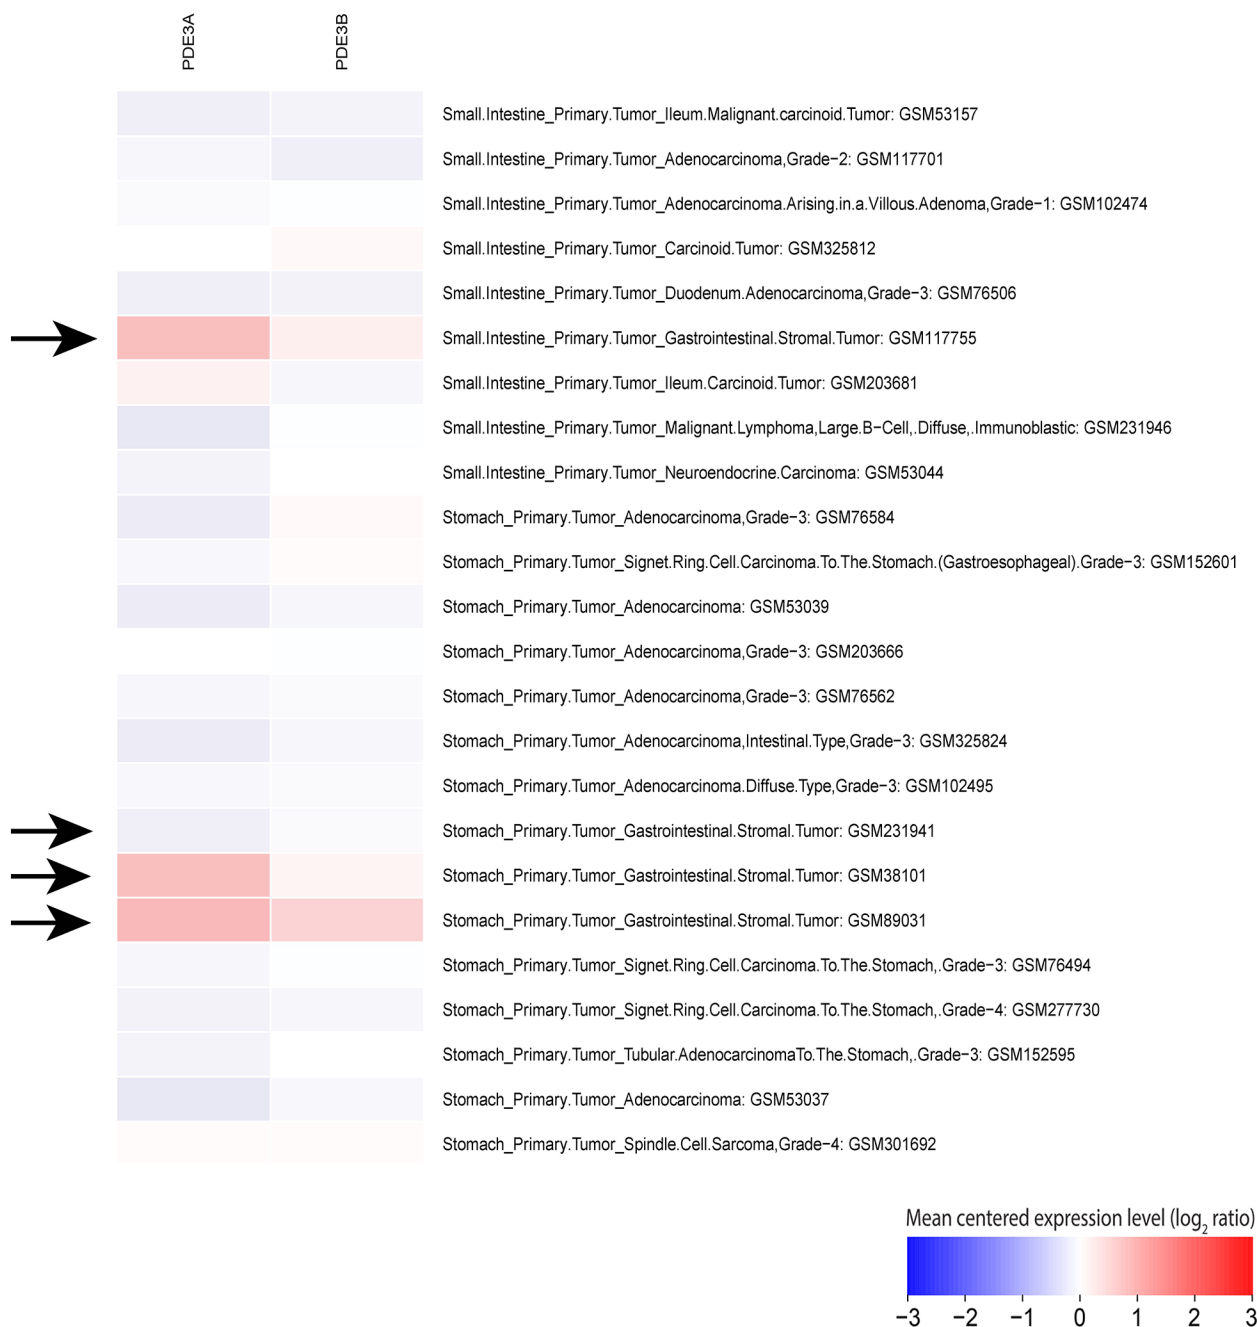

**Supplementary Figure 4: PDE3A and PDE3B expression in primary gastrointestinal stromal tumors.** Heatmap of PDE3A and PDE3B expression in primary tumors of digestive tract [36]. Black arrows indicate gastrointestinal tumors. PDE3A appears generally more expressed than PDE3B in primary GIST.

**Supplementary Table 1: Primary and secondary antibodies for immunostaining**

| <b>Primary antibodies</b>   | <b>Supplier</b>                           | <b>Cat. N°</b> | <b>Host</b> | <b>Dilution</b> |
|-----------------------------|-------------------------------------------|----------------|-------------|-----------------|
| SLFN12                      | Abcam                                     | ab113238       | Rabbit      | 1/500           |
| hPDE3A (1095-1110)          | MRC-PPU Reagents                          | S721A          | Sheep       | 1/2000          |
| mPDE3A (1098-1115)          | NHLBI [19]                                | N/A            | Rabbit      | 1/500           |
| alphaSMA                    | Sigma                                     | C6198          | Mouse       | 1/30.000        |
| KIT (D13A2)                 | Cell signaling technology                 | 3074           | Rabbit      | 1/500           |
| KIT                         | DAKO                                      | A4502          | Rabbit      | 1/500           |
| <b>Secondary antibodies</b> | <b>Supplier</b>                           | <b>Cat.N°</b>  | <b>Host</b> | <b>Dilution</b> |
| Anti sheep Biotin-SP        | Jackson Immunoresearch laboratories, Inc. | 713-065-147    | Donkey      | 1/200           |
| Anti rabbit Biotin-SP       | Jackson Immunoresearch laboratories, Inc. | 711-065-152    | Donkey      | 1/200           |
| Anti sheep Alexa 488        | Jackson Immunoresearch laboratories, Inc. | 713-545-147    | Donkey      | 1/200           |
| Anti rabbit Alexa 594       | Jackson Immunoresearch laboratories, Inc. | 711-585-152    | Donkey      | 1/200           |
| Anti rabbit Alexa 647       | Jackson Immunoresearch laboratories, Inc. | 711-605-152    | Donkey      | 1/200           |

**Supplementary Table 2: Primary and secondary antibodies for Western blot**

| <b>Primary antibodies</b>   | <b>Supplier</b>                           | <b>Cat. N°</b> | <b>Host</b> | <b>Dilution</b> |
|-----------------------------|-------------------------------------------|----------------|-------------|-----------------|
| SLFN12                      | Abcam                                     | ab113238       | Rabbit      | 1/200           |
| hPDE3A (1095-1110)          | MRC-PPU Reagents                          | S721A          | Sheep       | 1/500           |
| mPDE3A (1098-1115)          | NHLBI [19]                                | N/A            | Rabbit      | 1/200           |
| ERK                         | Cell signaling technology                 | 9102           | Rabbit      | 1/500           |
| pERK Thr202/Tyr204          | Cell signaling technology                 | 9106           | Mouse       | 1/500           |
| GAPDH (14C10)               | Cell signaling technology                 | 2118           | Rabbit      | 1/200           |
| <b>Secondary antibodies</b> | <b>Supplier</b>                           | <b>Cat.N°</b>  | <b>Host</b> | <b>Dilution</b> |
| Anti sheep Alexa 680        | Jackson Immunoresearch laboratories, Inc. | 713-625-147    | Donkey      | 1/10.000        |
| Anti rabbit 680RD           | LI-COR                                    | 925-68073      | Donkey      | 1/10.000        |
| Anti mouse 800CW            | LI-COR                                    | 925-32212      | Donkey      | 1/10.000        |

**Supplementary Table 3: Primers used on human GIST882 cells**

| <b>Primers</b>     | <b>Sequence</b>           |
|--------------------|---------------------------|
| GAPDH Fw           | TGTGTCCGTCGTGGATCTGA      |
| GAPDH Rev          | CCTGCTCACCACCTTCTTGA      |
| $\beta$ -Actin Fw  | AACCGTGAAAAGATGACCCAGAT   |
| $\beta$ -Actin Rev | GCCTGGATGGCTACGTACATG     |
| PDE3A Fw           | TTTCCTTAGAGAGGTTCAAGGTCG  |
| PDE3A Rev          | AATACTGGTTCCTGAAGACTGTGAT |

Supplementary Table 4: Clinicopathologic features of SuperBiochips GIST TMA

| <b>SuperBiochips GIST TMA</b> |                        |
|-------------------------------|------------------------|
| <b>Sex/Age average</b>        | <b>Total (n)/years</b> |
| Male                          | 28/58.3                |
| Female                        | 22/62.6                |
| <b>Primary tumor site</b>     | <b>Total (n)</b>       |
| Gastric                       | 24                     |
| Small bowel                   | 15                     |
| Abdominal cavity              | 1                      |
| Rectum                        | 2                      |
| Disseminated                  | 8                      |
| <b>Tumor morphology</b>       | <b>Total (n)</b>       |
| Spindle                       | 47                     |
| Epithelioid                   | 3                      |
| <b>Risk category</b>          | <b>Total (n)</b>       |
| Malignant                     | 8                      |
| High risk                     | 26                     |
| Intermediate risk             | 8                      |
| Low risk                      | 8                      |
| <b>Mitotic Figures</b>        | <b>Total (n)</b>       |
| ≤5/50                         | 24                     |
| >5/50                         | 26                     |
| <b>KIT-ir</b>                 | <b>Total (n)</b>       |
| positive                      | 50                     |
| negative                      | 0                      |



Supplementary Table 5: Clinicopathologic features of CMMI DiaPath GIST TMA

| CMMI DiaPath GIST TMA     |                        |
|---------------------------|------------------------|
| <b>Sex/Age average</b>    | <b>Total (n)/years</b> |
| Male                      | 34/58.3                |
| Female                    | 22/62.6                |
| <b>Primary tumor site</b> | <b>Total (n)</b>       |
| Gastric                   | 26                     |
| Small bowel               | 22                     |
| Colon                     | 1                      |
| Disseminated              | 5                      |
| <b>Tumor morphology</b>   | <b>Total (n)</b>       |
| Spindle                   | 64                     |
| Epithelioid               | 11                     |
| <b>Risk category</b>      | <b>Total (n)</b>       |
| Malignant                 | 14                     |
| High risk                 | 12                     |
| Intermediate risk         | 9                      |
| Low risk                  | 21                     |
| <b>Mitotic Figures</b>    | <b>Total (n)</b>       |
| ≤5/50                     | 32                     |
| >5/50                     | 24                     |
| <b>KIT-ir</b>             | <b>Total (n)</b>       |
| positive                  | 67                     |
| negative                  | 8                      |

Supplementary Table 6: Biothèque de Liège, FFPE GIST slides clinicopathologic features

| Code        | Sex | Age | Organ    | Diagnostic     | Type    | Immunostaining<br>+       | Immunostaining<br>-      |
|-------------|-----|-----|----------|----------------|---------|---------------------------|--------------------------|
|             |     |     |          |                |         |                           | Desmin                   |
|             |     |     |          |                |         |                           | Neurofilaments           |
|             |     |     |          |                |         |                           | Actin                    |
| BPGIST10/05 | M   | 62  | Duodenum | Malignant GIST | Primary | Vimentin<br>CD117         | S100<br>Ki64<br>CD34     |
|             |     |     |          |                |         |                           | Factor VIII              |
|             |     |     |          |                |         |                           | CD117                    |
| BPGIST10/09 | F   | 66  | Stomach  | GIST           | Primary | Vimentin<br>CD34<br>CD99  | EMA<br>NSE<br>S100       |
|             |     |     |          |                |         |                           | Actin                    |
| BPGIST10/11 | M   | 68  | Stomach  | GIST           | Primary | Vimentin<br>CD34<br>CD117 | Desmin<br>Actine<br>S100 |
|             |     |     |          |                |         |                           | SMMHC                    |
|             |     |     |          |                |         | CD117                     |                          |
| BPGIST10/17 | F   | 65  | Stomach  | Malignant GIST | Primary | CD34<br>Desmin<br>S100    | Actin                    |
|             |     |     |          |                |         | Ki-67 (5-10%)             |                          |
